# Supplementary material
Source: HighWire-hosted journal article supplement (https://bmjopen.bmj.com/content/12/3/e055289)
Supplement: inline-supplementary-material-1 [file inline-supplementary-material-1.pdf]

### Interview Guide for Recovery College Study Participants

1. How would you describe your experience as a student at \_\_\_\_\_ Recovery College?  
Probe: What have you enjoyed most? Least?
2. How does the Recovery College compare with other services you have accessed for your mental health?
  - Probe: Could you provide an example?
3. What does this Recovery College do particularly well, in your opinion?
  - Probe: Communicating with students? Quality of instructors?
4. In what areas could this Recovery College improve to better suit your mental health needs or interests?
5. As we are developing this evaluation framework with Recovery College students such as yourself, what elements of Recovery College do you think we should be evaluating to measure its success?
  - Probe: Popularity of certain courses? Teaching styles of course facilitators? Impact on your life?
6. In your opinion, how do you think this Recovery College could be evaluated?
  - Probe: Town Halls with students? One-on-one consultations with external folks? A quick online survey with students? Cumulatively via a portfolio of student work/progress? All of the above?
7. Would it be okay if we re-contact you later in our study to get your feedback on our evaluation framework? It's okay if you don't want us to contact you.
